# Supplementary material for: Characterization of Genomic Diversity among Carbapenem-Resistant Escherichia coli Clinical Isolates and Antibacterial Efficacy of Silver Nanoparticles from Pakistan
Source: MDPI journal article supplement (doi:10.3390/microorganisms10112283), 2022-11-17
Supplement: s1 [file s1]

**Table S1: Nucleotide sequences for PCR and sequencing**

|                                        | Primer Sequences                                                                                       | Tm (°C) / Amplicon (bp) |
|----------------------------------------|--------------------------------------------------------------------------------------------------------|-------------------------|
| <b>Carbapenemases [12, 13]</b>         |                                                                                                        |                         |
| <i>bla<sub>KPC-2</sub></i>             | F: GCTACACCTAGCTCCACCTTC<br>R: ACAGTGGTTGGTAATCCATGC                                                   | 55 / 989                |
| <i>bla<sub>NDM-1</sub></i>             | F: GGGCAGTCGCTTCCAACGGT<br>R: GTAGTGCTCAGTGTCGGCAT                                                     | 53 / 476                |
| <i>bla<sub>NDM-1</sub></i>             | F: ATGGAATTGCCCAATATTATGC<br>R: TCAGCGCAGCTTGTCGGCCAT                                                  | 50 / 813                |
| <i>bla<sub>VIM</sub></i>               | F: GATGGTGTGTTGGTCGCATA<br>R: CGAATGCGCAGCACCAG                                                        | 52 / 390                |
| <i>bla<sub>OXA-48</sub></i>            | F: GCGTGGTTAAGGATGAACAC<br>R: CATCAAGTTCAACCCAACCG                                                     | 52 / 438                |
| <i>bla<sub>IMP</sub></i>               | F: GGAATAGAGTGGCTTAAATCTC<br>R: GGTTTAAAYAAAACAACCACC                                                  | 52 / 232                |
| <b>ESBLs [14]</b>                      |                                                                                                        |                         |
| <i>bla<sub>SHV</sub></i>               | F: CTTTATCGGCCCTCACTCAA<br>R: AGGTGCTCATCATGGGAAAG                                                     | 55 / 237                |
| <i>bla<sub>TEM</sub></i>               | F: CGCCGCATACACTATTCTCAGAATGA<br>R: ACGCTCACCGGCTCCAGATTTAT                                            | 55 / 445                |
| <i>bla<sub>CTX-M</sub></i>             | F: ATGTGCAGYACCAGTAARGTKATGGC <sup>SEP</sup> <sub>SEP</sub><br>R: TGGGTRAARTARGTSACCAGAAAYCAGCGG       | 55 / 593                |
| <b>MLST</b>                            |                                                                                                        |                         |
| <b>PCR amplification (Tm 55°C)[15]</b> |                                                                                                        |                         |
| <i>dinB</i>                            | F: GTTTTCCCAGTCACGACGTTGTATGAGAGGTGAGCAATGCGTA<br>R: TTGTGAGCGGATAACAATTTCCGTAGCCCCATCGCTTCCAG         |                         |
| <i>icd2</i>                            | F: GTTTTCCCAGTCACGACGTTGTAATTCGCTTCCCGGAACATTG<br>R: TTGTGAGCGGATAACAATTTTCATGATCGCGTCACCAAAYTC        |                         |
| <i>pabB</i>                            | F: GTTTTCCCAGTCACGACGTTGTAAATCCAATATGACCCGCGAG<br>R: TTGTGAGCGGATAACAATTTCCGTTCCAGTTCGTCGATAAT         |                         |
| <i>polB</i>                            | F: GTTTTCCCAGTCACGACGTTGTAGGCGGCTATGTGATGGATTG<br>R: TTGTGAGCGGATAACAATTTCCGTTGGCATCAGAAAACGGC         |                         |
| <i>putP</i>                            | F: GTTTTCCCAGTCACGACGTTGTACTGTTTAACCCGTGGATTGC<br>R: TTGTGAGCGGATAACAATTTTCGCATCGGCCTCGGCAAAGCG        |                         |
| <i>trpA</i>                            | F: GTTTTCCCAGTCACGACGTTGTAGCTACGAATCTCTGTTTGCC<br>R: TTGTGAGCGGATAACAATTTTCGCTTTCATCGGTTGTACAAA        |                         |
| <i>trpB</i>                            | F: GTTTTCCCAGTCACGACGTTGTACACTATATGCTGGGCACCGC<br>R: TTGTGAGCGGATAACAATTTCCCTCGTGCTTTCAAAATATC         |                         |
| <i>uidA</i>                            | F: GTTTTCCCAGTCACGACGTTGTACATTACGGCAAAGTGTGGGTCAAT<br>R: TTGTGAGCGGATAACAATTTCCCATCAGCACGTTATCGAATCCTT |                         |
| <b>Sequencing</b>                      |                                                                                                        |                         |
| oF                                     | GTTTTCCCAGTCACGACGTTGTA                                                                                |                         |
| oR                                     | TTGTGAGCGGATAACAATTTTC                                                                                 |                         |

Abbreviations: *bla<sub>KPC</sub>*, *klebsiella pneumoniae* carbapenemase gene; *bla<sub>NDM</sub>*, New Delhi metallo beta lactamase; beta *bla<sub>OXA-48</sub>*, beta-lactamase oxacillinase 48 gene; *bla<sub>VIM</sub>*, metallo-beta-lactamase verona integron gene; *bla<sub>IMP</sub>*, beta-lactamase imipenemase gene; *bla<sub>CTX-M</sub>*, beta-lactamase cefotaxime munich gene; *bla<sub>SHV</sub>*, beta-lactamase sulfhydryl reagent variable gene; *bla<sub>TEM</sub>*, beta-lactamase temoneira gene; *dinB*, DNA polymerase; *icdA*, isocitrate dehydrogenase; *pabB*, p-aminobenzoate synthase; *polB*, polymerase PolIII; *putP*, proline permease; *trpA*, tryptophan synthase subunit A; *trpB*, tryptophan synthase subunit B; *uidA*, beta-glucuronidase

**Table S2: Concentration of MEM and AgNPs**

| MEM (µg/mL) | AgNPs (µg/mL) | MEM / AgNPs (µg/mL) |
|-------------|---------------|---------------------|
| 1024        | 10            | 512 / 10            |
| 512         | 5             | 256 / 5             |
| 256         | 2.5           | 128 / 2.5           |
| 128         | 1.25          | 64 / 1.25           |
| 64          | 0.625         | 32 / 0.625          |
| 32          | 0.312         | 16 / 0.312          |
| 16          |               |                     |
| 8           |               |                     |
